# Supplementary material
Source: Royal Society of Chemistry journal article supplement (doi:10.1039/d6dt00476h)
Supplement: d6dt00476h1.pdf [file d6dt00476h1.pdf]

## **Nanoscale Layer-Separated Zincophosphate Framework Enabled by Dual-Mode Aromatic Pillar Engineering for Selective Luminescent Dye Detection**

Jia-Yi Jian,<sup>a,+</sup> Pi-Chen Wei,<sup>b,+</sup> Kai-Chi Chang,<sup>c</sup> Chun-Ru Hsu,<sup>a</sup> Ching-Ping Lu,<sup>d</sup> and Chih-Min Wang<sup>\*,a</sup>

*<sup>a</sup>Department of Bioscience and Biotechnology, National Taiwan Ocean University, Keelung, 202, Taiwan, Republic of China.*

*<sup>b</sup>Department of Food Science, National Ilan University, Yilan 260, Taiwan, Republic of China.*

*<sup>c</sup>Department of Applied Chemistry, National Chi Nan University, Nantou 540, Taiwan, Republic of China.*

*<sup>d</sup>Department of Environmental Biology and Fisheries Science, National Taiwan Ocean University, Keelung 202, Taiwan, Republic of China.*

*<sup>+</sup> Jia-Yi Jian, and Pi-Chen Wei contributed equally to this work.*

Corresponding Author: [orcid.org/0000-0002-0891-4523](https://orcid.org/0000-0002-0891-4523); Email: [twcmwang@gmail.com](mailto:twcmwang@gmail.com); [cmwang@ntou.edu.tw](mailto:cmwang@ntou.edu.tw) (CM Wang).

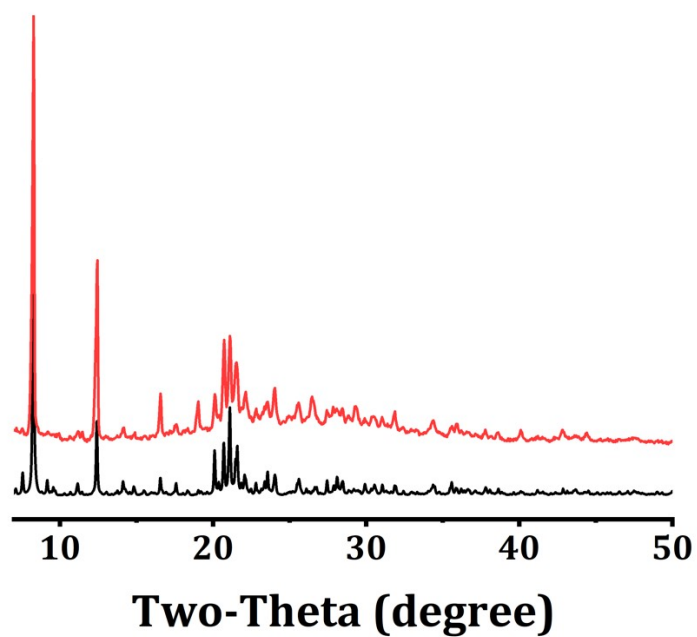

**Fig. S1** X-ray powder patterns of NTOU-11 (red) and the simulated pattern derived from single-crystal X-ray diffraction (black).

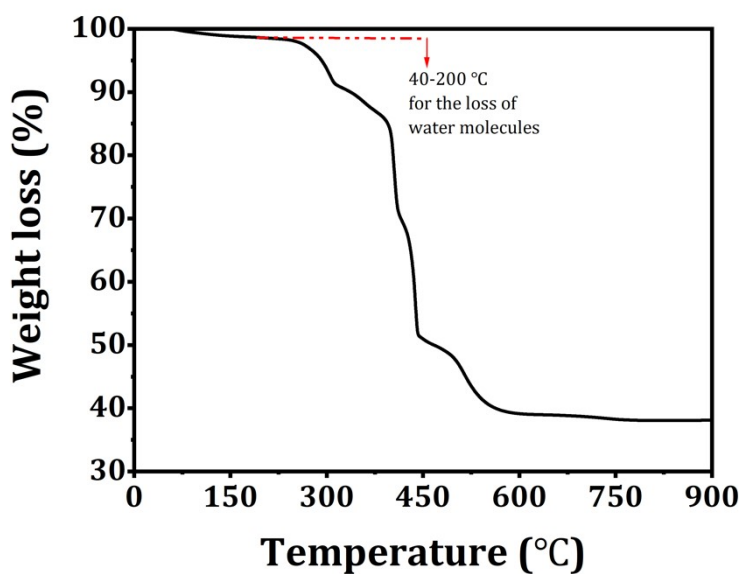

**Fig. S2** TGA curve of NTOU-11 in O<sub>2</sub> at a heating rate of 5°C/ min<sup>-1</sup> from 40 °C to 900 °C.

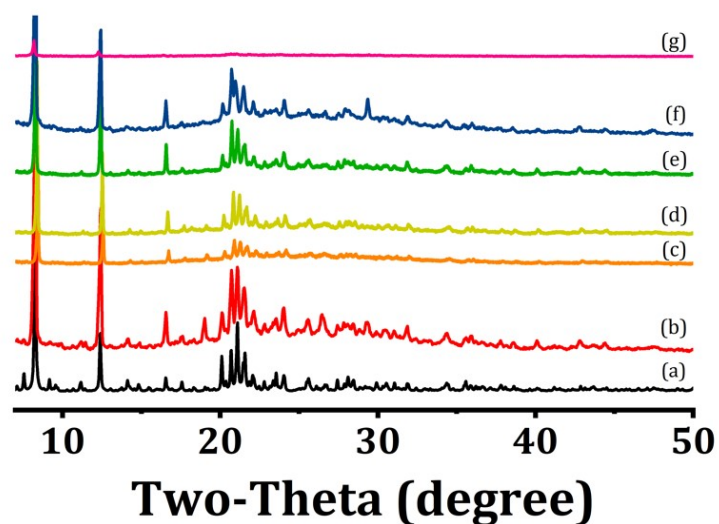

**Fig. S3** X-ray powder patterns of NTOU-11 for thermal stability studies: (a) simulated, (b) as-synthesized, (c) after holding at 100°C for 30 min, (d) 200°C (e) 250°C (f) 300°C (g) 350°C.

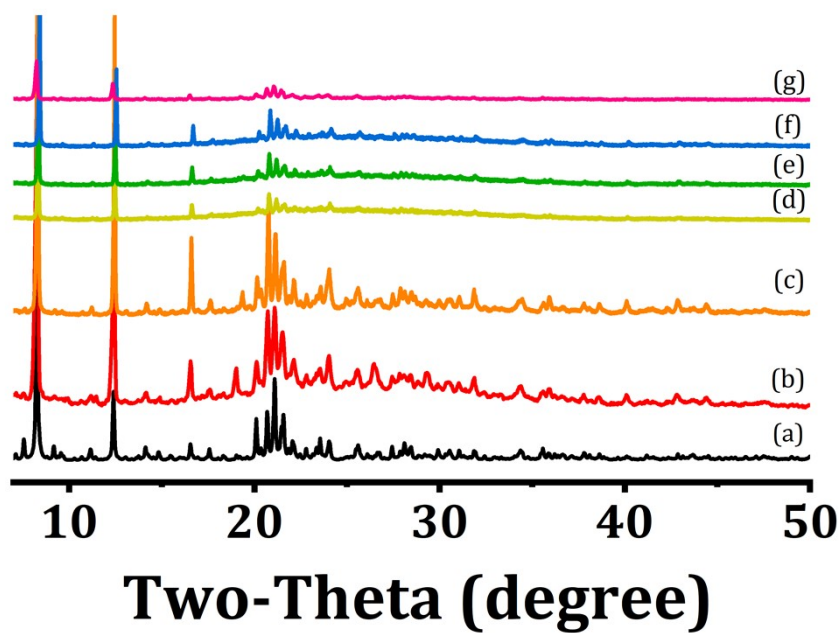

**Fig. S4** X-ray powder patterns of NTOU-11 powder after stirring in aqueous solutions at different pH values for 1 h: (a) simulated, (b) as-synthesized, (c) pH4, (d) pH6, (e) pH8, (f) pH10, (g) pH12.

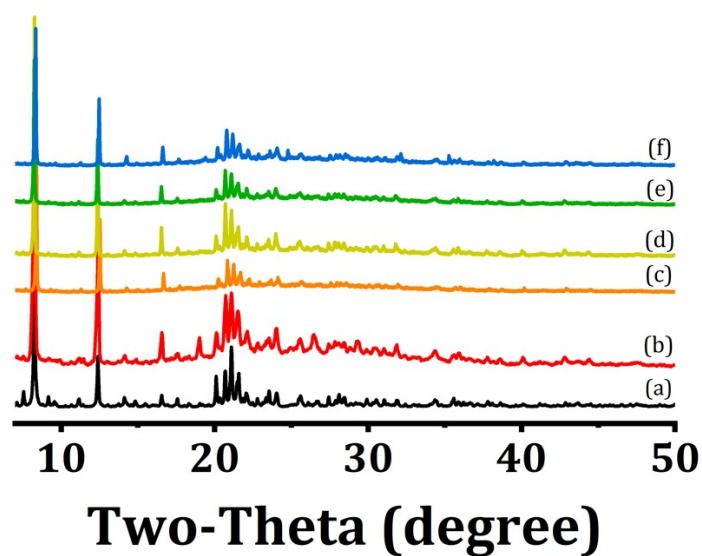

**Fig. S5** X-ray powder patterns of NTOU-11 for chemical stability studies: (a) simulated (b) as-synthesized, after stirring for 7 hours in (c) water, (d) ethanol, (e) DMF, and (f) 0.1 M PBS.

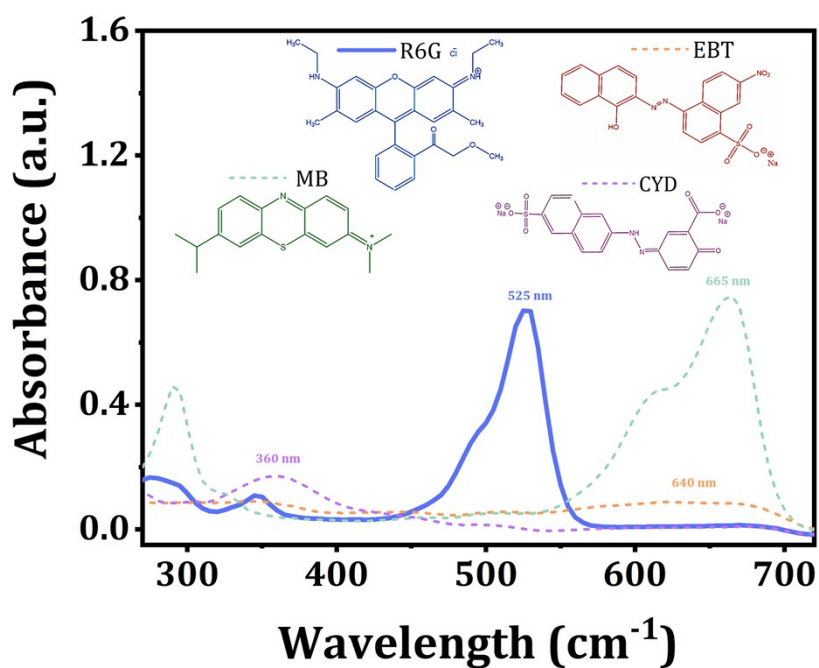

**Fig. S6** (a) Absorption peaks of Rhodamine 6G (pink), Eriochrome black T (violet), Methylene blue (blue), and Chrome yellow D (chartreuse). (b) Molecular structures of organic dyes and the wavelength proximity between their absorption peaks and the emission peak of NTOU-11.

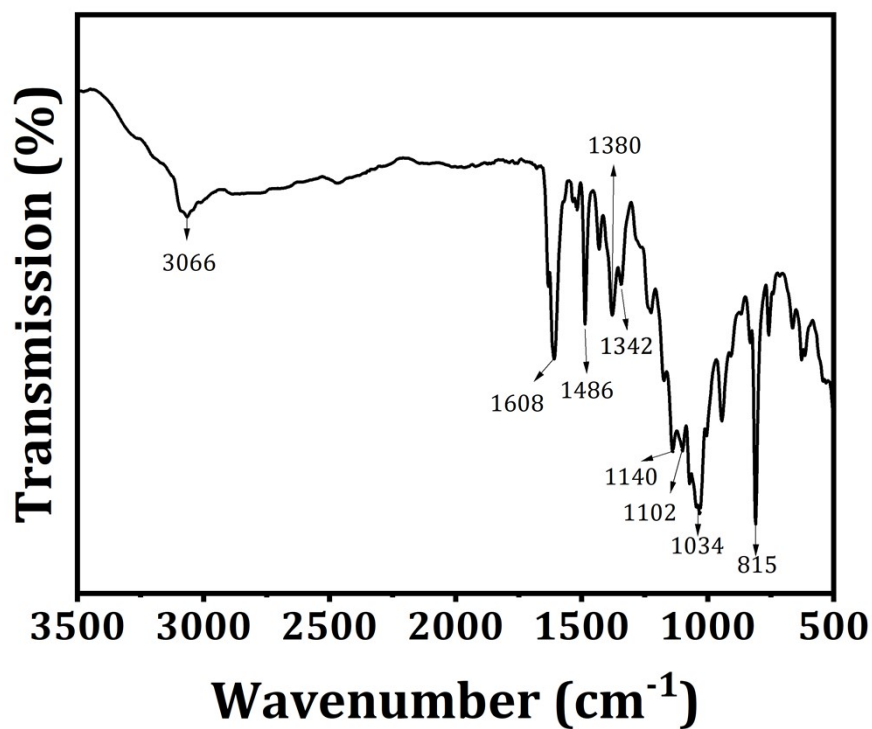

Fig. S7 FTIR spectrum of NTOU-11.

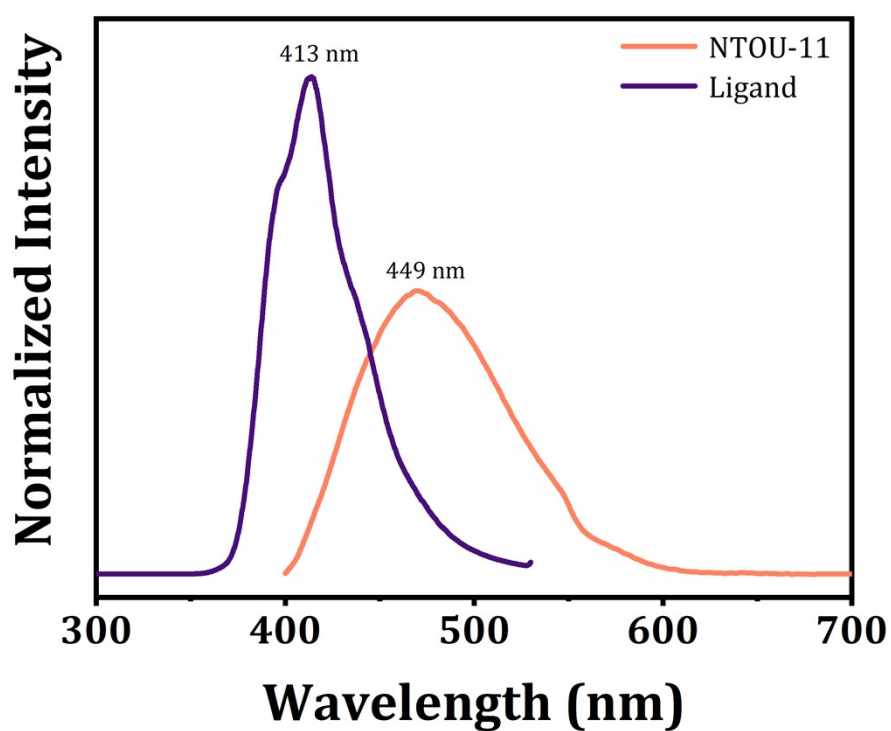

Fig. S8 PL spectra of NTOU-11 and the DPBP ligand ( $\lambda_{\text{ex}} = 369$  nm).

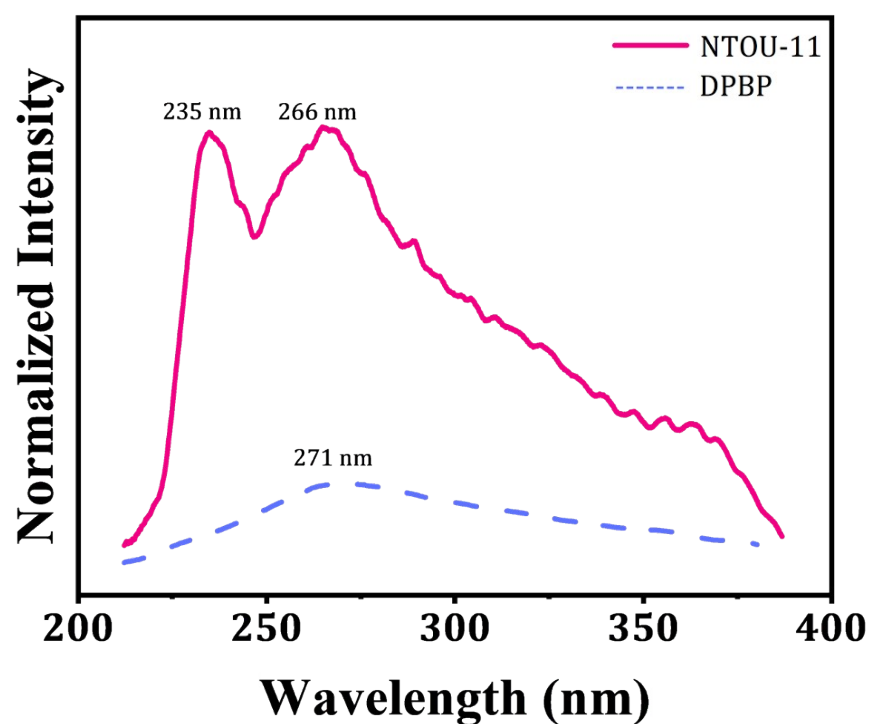

**Fig. S9** Excitation spectra of the free DPBP and compound NTOU-11.

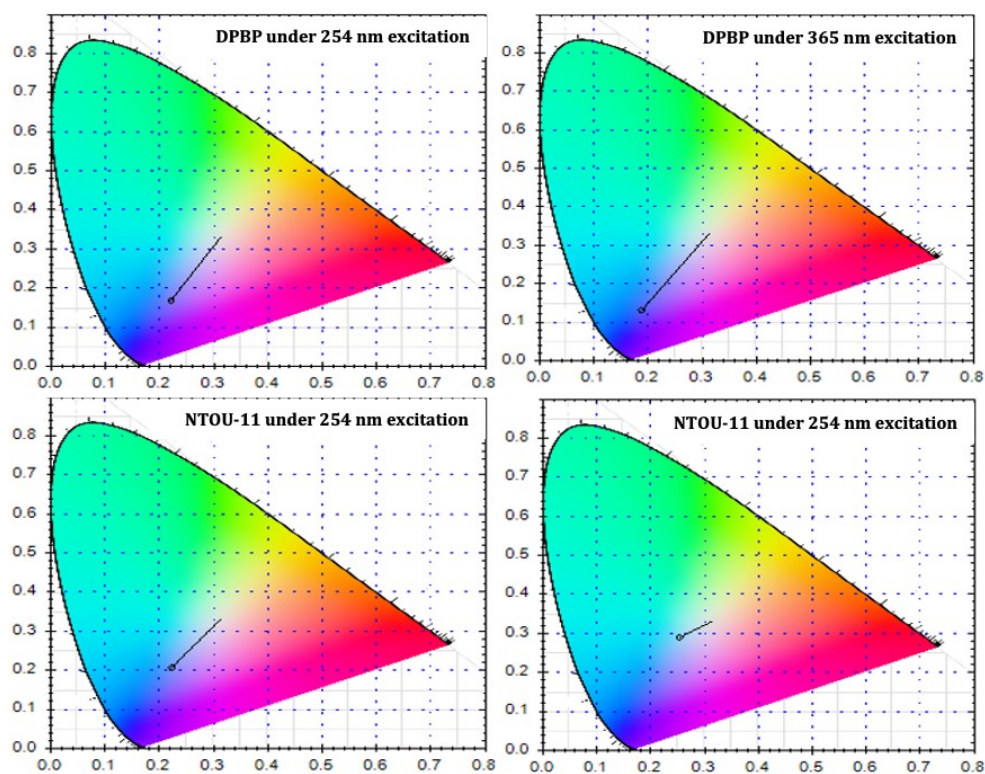

**Fig. S10** CIE chromaticity diagrams of the free DPBP ligand (top) and NTOU-11 (bottom) under UV light irradiation at 254 nm and 365 nm.

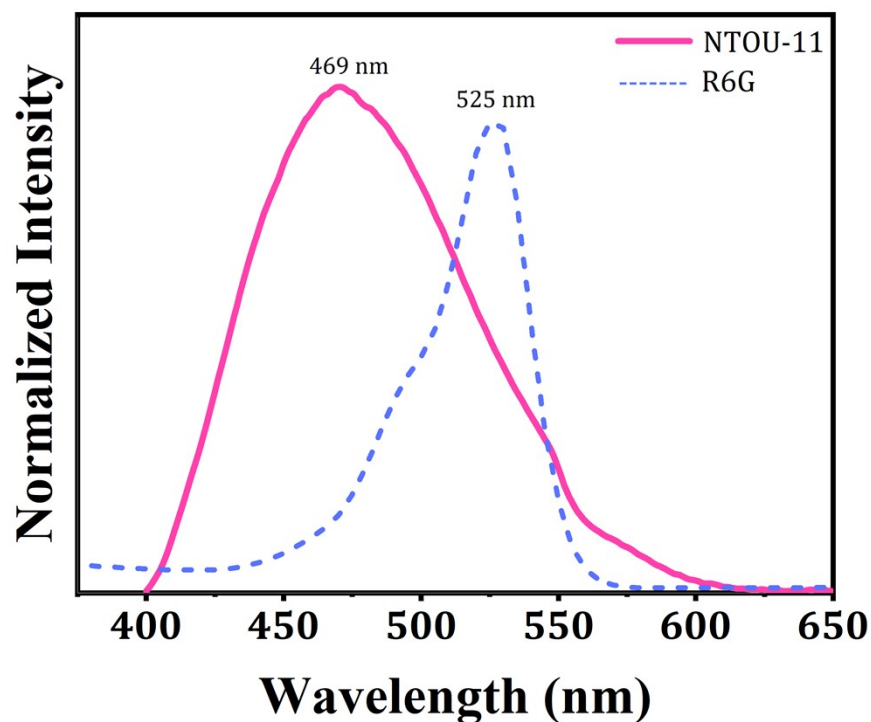

**Fig. S11** The absorption peak of Rhodamine 6G and the emission peak of NTOU-11.

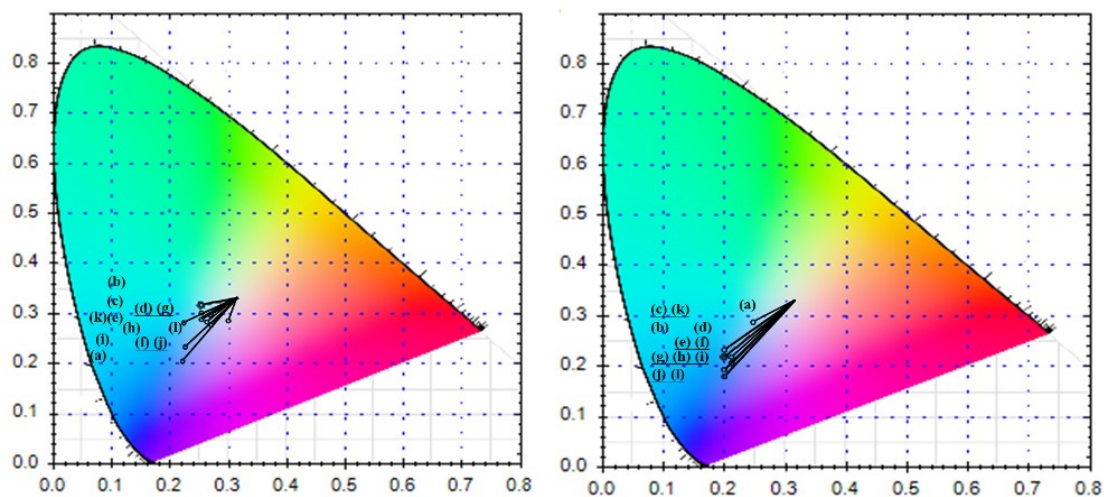

**Fig. S12** CIE chromaticity diagrams of NTOU-11 and R6G@NTOU-11 powders with concentrations ranging of R6G from 0.001 mM to 20 mM under 254 nm (left) and 365 nm (right) UV light irradiation. (a) compound CY (b) 0.001 mM R6G (c) 0.01 mM R6G (d) 0.05 mM R6G (e) 0.1 mM R6G (f) 0.25 mM R6G (g) 0.5 mM R6G (h) 1 mM R6G (i) 5 mM R6G (j) 10 mM R6G (k) 15 mM R6G (l) 20 mM R6G.

**Table S1.** Comparison of structural features between NTOU-11 and related materials.

| Compound                                                                                                                                                                                        | Coordination Modes of Organic Molecules                                                     | Inorganic Motifs                                                                                                                     | Structural Variations                                                                     |
|-------------------------------------------------------------------------------------------------------------------------------------------------------------------------------------------------|---------------------------------------------------------------------------------------------|--------------------------------------------------------------------------------------------------------------------------------------|-------------------------------------------------------------------------------------------|
| <b>NTHU-2</b><br>(H <sub>2</sub> tmdp)[(ZnHPO <sub>4</sub> ) <sub>2</sub> (BDC)]                                                                                                                | BDC acts as an anionic pillar; tmdp acts as a protonated cation.                            | Corrugated [4.8 <sup>2</sup> ] inorganic net of alternating ZnO <sub>4</sub> and HPO <sub>4</sub> tetrahedra.                        | Exhibits a bimodal pore size distribution (1.36 and 21.8 nm).                             |
| <b>NTHU-4</b><br>(H <sub>2</sub> tmdp) <sub>2</sub> [Zn <sub>3</sub> Ga <sub>6</sub> O(HPO <sub>4</sub> )(PO <sub>4</sub> ) <sub>8</sub> ]·5H <sub>2</sub> O                                    | tmdp acts as a diprotonated cation.                                                         | Framework composed of corner-sharing GaO <sub>4</sub> , MO <sub>4</sub> (M = Zn/Ga), and PO <sub>4</sub> /HPO <sub>4</sub> polyhedra | Features a unique 3D network with 14-membered ring channels.                              |
| <b>NTHU-8</b><br>(Hbpy)[Zn <sub>2</sub> PO <sub>4</sub> (btec)(Hbpy) <sub>2</sub> ]                                                                                                             | btec serves as an anionic linker; Hbpy plays a dual role as a terminal ligand and template. | 1D chains built of corner-sharing ZnO <sub>3</sub> N and PO <sub>4</sub> tetrahedra                                                  | Features nanoscale channels and bimodal porosity.                                         |
| <b>NTHU-10</b><br>(Hbpy)[Zn(H <sub>2</sub> PO <sub>4</sub> )(btec) <sub>0.5</sub> ]                                                                                                             | btec serves as an anionic ligand; Hbpy acts as a template.                                  | 0D subunits consisting of ZnO <sub>4</sub> and H <sub>2</sub> PO <sub>4</sub> tetrahedra                                             | The first 3D organometallophosphate structure constructed from 0D inorganic building unit |
| <b>NTOU-11</b> (in this work)<br>Zn <sub>8</sub> (HPO <sub>4</sub> ) <sub>2</sub> (PO <sub>4</sub> ) <sub>4</sub> (HDPBP) <sub>2</sub> (DPBP) <sub>3</sub> ·2NO <sub>3</sub> ·2H <sub>2</sub> O | DPBP plays a dual role as a linker and a terminal unit                                      | 2D layers composed of 3-, 4-, and 8-membered rings.                                                                                  | Features a nanoscale interlayer separation exceeding 20 Å.                                |

BDC = 1,4-benzene dicarboxylate; tmdp = 4,4'-trimethylene dipyridine; btec = benzene-1,2,4,5-tetracarboxylate; bpy = 4,4'-bipyridine; DPBP = 4,4'-di(4-pyridyl)biphenyl

**Table S2.** CIE chromaticity coordinates of DPBP ligand and NTOU-11 under 254 nm and 365 nm irradiation.

| <b>Wavelength (nm)</b> | <b>254 nm</b> | <b>365 nm</b> |
|------------------------|---------------|---------------|
| DPBP                   | (0.22, 0.16)  | (0.18, 0.13)  |
| NTOU-11                | (0.22, 0.20)  | (0.25, 0.28)  |

**Table S3.** The CIE coordinates of **R6G@NTOU-11** powders under 254 nm and 365 nm irradiation.

| <b>R6G concentration</b> | <b>0.001 mM</b> | <b>0.01 mM</b> | <b>0.05 mM</b> | <b>0.1 mM</b> | <b>0.25 mM</b> | <b>0.5 mM</b> | <b>1 mM</b>  | <b>5 mM</b>  | <b>10 mM</b> | <b>15 mM</b> | <b>20 mM</b> |
|--------------------------|-----------------|----------------|----------------|---------------|----------------|---------------|--------------|--------------|--------------|--------------|--------------|
| Under 254 nm irradiation | (0.25, 0.32)    | (0.25, 0.30)   | (0.27, 0.29)   | (0.25, 0.28)  | (0.27, 0.27)   | (0.27, 0.29)  | (0.26, 0.28) | (0.23, 0.23) | (0.27, 0.27) | (0.23, 0.26) | (0.30, 0.29) |
| Under 365 nm irradiation | (0.20, 0.22)    | (0.20, 0.23)   | (0.21, 0.22)   | (0.21, 0.21)  | (0.21, 0.21)   | (0.20, 0.19)  | (0.20, 0.19) | (0.20, 0.19) | (0.20, 0.18) | (0.20, 0.23) | (0.20, 0.18) |
